**Running Head:** fMRI assessment of motor learning and escitalopram

**Modulation of premotor cortex response to sequence motor learning during escitalopram-intake**

Eóin N. Molloy<sup>1,2,3,4</sup>, Karsten Mueller<sup>2,5</sup>, Nathalie Beinhořlzl<sup>1,3</sup>, Maria Blöchl<sup>2,3,8</sup>, Fabian A. Piecha<sup>1,3</sup>, André Pampel<sup>5</sup>, Christopher J. Steele<sup>3,12</sup>, Ulrike Scharrer<sup>1,3</sup>, Gergana Zheleva<sup>1,3</sup>, Ralf Regenthal<sup>9</sup>, Bernhard Sehm<sup>3,7,13</sup>, Vadim V. Nikulin<sup>3,6</sup>, Harald E. Möllner<sup>2,5</sup>, Arno Villringer<sup>2,3,4,10,11</sup> & Julia Sacher<sup>1,2,3,10</sup>

Emotion & Neuroimaging Lab, Max Planck Institute for Human Cognitive and Brain Sciences<sup>1</sup>  
International Max Planck Research School NeuroCom<sup>2</sup>  
Dept. of Neurology, Max Planck Institute for Human Cognitive and Brain Sciences<sup>3</sup>  
Faculty of Medicine, Leipzig University<sup>4</sup>  
Nuclear Magnetic Resonance Unit, Max Planck Institute for Human Cognitive and Brain Sciences<sup>5</sup>  
Centre for Cognition and Decision Making, Institute for Cognitive Neuroscience, National Research University Higher School of Economics<sup>6</sup>  
Neuroplasticity & Motor Recovery Group, Max Planck Institute for Human Cognitive and Brain Sciences<sup>7</sup>  
Dept. of Psychology, University of Münster<sup>8</sup>  
Division of Clinical Pharmacology, Rudolf-Boehm-Institute of Pharmacology and Toxicology, Leipzig University<sup>9</sup>  
Clinic for Cognitive Neurology<sup>10</sup>  
Berlin School of Mind and Brain<sup>11</sup>  
Dept. of Psychology, Concordia University<sup>12</sup>  
Dept. of Neurology, Martin Luther University Halle-Wittenberg<sup>13</sup>

Correspondence:

Eoin N. Molloy, MSc - Max Planck Institute for Human Cognitive and Brain Sciences, Stephanstr. 1A, 04103, Leipzig, Germany, molloy@cbs.mpg.de, tel: +49 341 9940-2215

Julia Sacher, MD, PhD - Max Planck Institute for Human Cognitive and Brain Sciences, Stephanstr. 1A, 04103, Leipzig, Germany, sacher@cbs.mpg.de, tel: +49 341 9940-2409

**Running Title:** fMRI assessment of motor learning and escitalopram

**Figures: 4, Tables: 3**

**Supplementary Figures: 1, Supplementary Tables: 4**

Word Count (including headings):

Abstract: 149

Introduction: 643

Materials and Methods: 1492

Results: 590

Discussion: 1382

Total

(Including

Abstract):

4256

**Running Head:** fMRI assessment of motor learning and escitalopram

**Abstract:**

The contribution of selective serotonin reuptake inhibitors (SSRIs) to motor learning by inducing motor cortical plasticity remains controversial given diverse findings from positive preclinical data to negative findings in recent clinical trials. To empirically address this translational disparity, we use functional magnetic resonance imaging (fMRI) in a double-blind, randomized controlled study to assess whether 20 mg escitalopram improves sequence-specific motor performance and modulates cortical motor response in 64 healthy female participants. We found decreased left premotor cortex responses during sequence-specific learning performance comparing single dose and steady escitalopram state. Escitalopram plasma-levels negatively correlated with the premotor cortex response. We did not find evidence in support of improved motor performance after a week of escitalopram-intake. These findings do not support the conclusion that 1-week escitalopram intake increases motor performance but could reflect early adaptive plasticity with improved neural processing underlying similar task performance when steady peripheral escitalopram levels are reached.

**Key words:** *selective serotonin reuptake inhibitors, sequential motor learning, neural plasticity, functional* *MRI.*

## **Running Head:** fMRI assessment of motor learning and escitalopram

### **1 Introduction:**

2 Motor learning is the improved performance of a motor task following practice<sup>1</sup> and is modulated  
3 by monoaminergic transmission in cortical and subcortical motor networks<sup>2,3,4</sup>. Research on this  
4 monoaminergic basis of motor learning typically focuses on dopamine signaling in both health<sup>5,6</sup>  
5 and disease<sup>7</sup>. Evidence from rodents<sup>8</sup> and stroke patients<sup>9</sup>, however, suggests that serotonin also  
6 critically modulates motor behavior. Selective serotonin reuptake inhibitors (SSRIs), commonly  
7 prescribed medications for depression and anxiety disorders<sup>10</sup>, increase extracellular serotonin  
8 and successfully treat post-stroke depression<sup>11</sup>. In the absence of depressive symptoms, several  
9 studies have also demonstrated an effect of SSRIs on the recovery of post-stroke motor  
10 dysfunction<sup>12</sup>. Notably, the FLAME trial (Fluoxetine for Motor Recovery After Acute Ischemic  
11 Stroke<sup>9</sup>) showed approximately 50% motor recovery in 57 patients following combined  
12 fluoxetine treatment and physiotherapy, in a multi-center Randomized Controlled Trial (RCT).  
13 These findings were further supported by a meta-analysis of 52 RCTs in 4,060 patients, which,  
14 however, also acknowledged heterogeneity and methodological shortcomings in a substantial  
15 proportion of trials<sup>13</sup>.

16

17 Possible mechanisms underlying SSRI modulation of motor performance and learning include  
18 anti-inflammatory<sup>14,15</sup> and neurotrophic effects<sup>16</sup> such as increased neurogenesis<sup>17</sup>, proliferation<sup>18</sup>,  
19 protein expression enhancement<sup>19</sup>, upregulation of beta1-adrenergic receptors<sup>20</sup>, downregulation  
20 of GABA-transmission<sup>21,22</sup>, and hippocampal long-term potentiation<sup>23</sup>. These findings suggest  
21 that SSRIs may increase responsivity to environmental stimuli, possibly via changes in inhibitory  
22 and excitatory balance<sup>24</sup> and reorganization of cortical networks<sup>25-27</sup>. Studies in humans have  
23 provided support for this by demonstrating changes in resting state functional connectivity  
24 induced by a single dose of escitalopram<sup>28</sup>. Additionally, decreases in resting state alpha-  
25 frequency band induced by tryptophan depletion<sup>29</sup>, which are hypothesized to reflect alterations

**Running Head:** fMRI assessment of motor learning and escitalopram

26 in the excitatory and inhibitory balance of cortical networks, have been observed in healthy  
27 volunteers. Moreover, preliminary functional magnetic resonance imaging (fMRI) evidence has  
28 linked decreased functional responses in the motor network with improved motor performance  
29 following fluoxetine administration<sup>30-33</sup>.

30

31 Recent large-scale RCTs in stroke patients such as the TALOS<sup>34</sup> and FOCUS trials<sup>35</sup>, involving  
32 over 642 and 3,000 patients, respectively, however, do not suggest beneficial effects of SSRIs on  
33 functional recovery. Critically, however<sup>36</sup>, these RCTs were conducted against the backdrop of  
34 routinely available rehabilitation and did not combine SSRI administration with a clearly defined  
35 motor learning paradigm, nor did they assess functional brain responses to SSRI intake. As a  
36 result, no previous study, either in healthy participants or in patients, has successfully leveraged  
37 prolonged training on an established motor learning paradigm in combination with SSRI-  
38 administration and fMRI in an adequately powered sample. Therefore, the hypothesis of whether  
39 SSRI administration, specifically in combination with an established motor learning paradigm,  
40 induces a beneficial effect on motor learning performance and changes the cortical motor  
41 response underlying the learning performance, remains to be tested empirically.

42

43 The current study utilizes fMRI to address whether one week of SSRI administration in  
44 combination with a sequential motor learning task improves sequence specific motor  
45 performance and elicits changes in concurrent cortical motor response during task performance.  
46 In a double-blind, randomized controlled pharmacofMRI study, we administered 20 mg (to  
47 reach 80% serotonin transporter (5-HTT) occupancy)<sup>37</sup> of escitalopram, the most 5-HTT selective  
48 and rapid onset SSRI<sup>38,39</sup> or placebo, to healthy females undergoing parallel fMRI assessment and  
49 training on a variant of the sequential pinch force task (SPFT)<sup>40</sup>. We chose a healthy  
50 homogeneous and young sub-sample to avoid variance associated with pathology<sup>41,42</sup>, sex<sup>33</sup>, and

**Running Head:** fMRI assessment of motor learning and escitalopram

51 age<sup>43</sup>. Our *a priori* hypotheses were (1) that one week of escitalopram intake would improve  
52 sequential motor performance relative to placebo, as assessed by performance in a temporal lag  
53 condition on the SPFT, calculated as the time difference between a computer controlled visual  
54 stimulus and participant control of a pinch-force device. (2) By specifying this sequence-learning  
55 condition in an fMRI contrast (hereafter referred to as the learning contrast, i.e., the difference of  
56 functional brain responses between two experimental conditions comprising two levels of task  
57 difficulty), we also hypothesized escitalopram-induced changes in fMRI-response in core  
58 components of the motor network during task performance.

## **Running Head:** fMRI assessment of motor learning and escitalopram

### 59 **Materials and methods:**

#### 60 **Participants & eligibility:**

61 Eligible individuals were right-handed, aged 18–35 years, with a body mass index (BMI) 18.5-25  
62 kg/m<sup>2</sup>, without history of neurological or psychiatric illness, and female on oral contraceptives  
63 for  $\leq 3$  months<sup>44,45</sup> to eliminate sex and hormone-dependent escitalopram responsivity<sup>46</sup>.  
64 Exclusion criteria were medication use, contraindications for MRI, tobacco use, alcohol abuse,  
65 positive drug or pregnancy tests, professional musicianship and athleticism, and abnormal QT  
66 times in electrocardiogram screenings. In total, 88 participants were screened with 71 enrolled.  
67 Analyses included 64 volunteers for the behavioral analysis as 6 (escitalopram=4) chose to  
68 discontinue participation and n=1 (placebo) was excluded due to a pre-analytical error in plasma  
69 sample acquisition. Sixty volunteers were included in functional imaging analysis as 4 were  
70 excluded due to MRI data quality concerns (2 escitalopram) due to head movement. 1 volunteer  
71 from the placebo group was excluded due to an artefact in an anatomical sequence and 1  
72 participant from the escitalopram group was excluded due to an artefact detected during  
73 acquisition of the functional sequence (Supplementary Figure 1).

74

#### 75 **Study design and procedure:**

76 The Ethics committee of the Faculty of Medicine, Leipzig University approved all procedures  
77 (approval number 390/16-ek) and the study was pre-registered at clinicaltrials.gov (ID:  
78 NCT03162185). Participants were randomized to receive either 20 mg of escitalopram or placebo  
79 (mannitol/aerosol) orally for 7 days. Randomization was performed by the Central Pharmacy of  
80 Leipzig University with equal condition allocation. Sequential motor training was conducted 5  
81 times (baseline, on day 1 of escitalopram administration, days 5 and 6 of drug administration, and  
82 at steady state – after 7 days) (Figure 1). Functional magnetic resonance imaging data (fMRI) and  
83 serum mature brain-derived neurotrophic factor (mBDNF) samples were acquired at baseline,

**Running Head:** fMRI assessment of motor learning and escitalopram

84 single dose, and steady state. Electrocardiogram recordings were conducted at single dose, day 4,  
85 and steady state to monitor potential changes in QT intervals. Adverse reactions to escitalopram  
86 were recorded using the antidepressant side-effects checklist (ASEC)<sup>47</sup>. All participants remained  
87 under medical supervision during the experiment. Concentrations of escitalopram in plasma was  
88 assessed chromatographically using a quality control sample. Deviation of the measured  
89 escitalopram concentration of the sample was tested for an acceptance interval of  $\pm 15\%$ . All  
90 behavioral and fMRI assessments took place 3 hours after escitalopram or placebo intake to allow  
91 for escitalopram to reach maximum levels in serum<sup>48</sup>.

92 **\*Figure 1\***

93 **Sequential pinch force task:**

94 We assessed sequence motor learning using a variant of the sequential pinch force task (SPFT),  
95 with Presentation (v16.5) running on WindowsXP. Baseline, single dose, and steady state  
96 measurements took place during fMRI, while day 5 and day 6 were conducted outside the  
97 scanner on an identical separate device. Task completion involved controlling the rise and fall of  
98 a yellow bar (force) via the participant's thumb and index finger (attenuated to individual  
99 strength) while attempting to match the speed of a moving computer controlled blue reference bar  
100 (Figure 1). We measured performance in two conditions: (1) a control condition, where the  
101 reference bar moves sinusoidally and (2) a sequence-specific learning condition, in which the  
102 reference moves in a sequential pattern that remains stable across sessions. A rest condition  
103 punctuated training to avoid fatigue. Each session consisted of 5 blocks with 3 trials per block  
104 and cycled through simple, rest, and learning. Participants received no feedback regarding  
105 performance. To assess performance, we calculated the time difference (lag) in milliseconds  
106 between the reference and force bar during the learning trials.

**Running Head:** fMRI assessment of motor learning and escitalopram

107 **Demographic data and statistical analysis:**

108 Independent samples *t*-tests using the R statistical programming language<sup>49</sup> tested for potential  
109 group differences in age, BMI, downregulated hormonal profile, and on total ASEC scores at  
110 single dose and steady state. A power analysis conducted using G\*Power<sup>50</sup> (v.3.1.9.4) assuming  
111 statistical power of 95% to detect a significant effect of escitalopram on sequence motor learning  
112 (*i.e. learning rate over 5 behavioral assessments compared to placebo*) with a small effect size  
113 and an  $\alpha$ -level of <0.05 suggested a minimum sample size of 56, with 28 participants per group.  
114 To account for potential drop-outs, we aimed to include 60 participants in total.

115 **Behavioral data preprocessing:**

116 All SPFT data were preprocessed using in house Matlab scripts. Quality control used an outlier  
117 labeling approach<sup>51</sup> implemented in Python (v2.7.15) in which trial, condition, group, and  
118 outcome specific interquartile ranges were multiplied by a factor of 1.5 to compute upper and  
119 lower bound thresholds.

120 **Behavioral data analysis:**

121 All behavioral data analyses were conducted using R.

122 (1) Independent samples *t*-tests assessed baseline group differences using the ‘t.test’ function to  
123 assess efficacy of randomization.

124 (2) Comparisons between groups over time employed an omnibus linear random-intercept mixed  
125 effect modeling approach using the ‘lmer’ function, within the ‘lme4’ package in R (independent  
126 factors: *group*, *time*, dependent variable: *lag*). Contributions of each fixed effects were assessed  
127 with a likelihood ratio test for improvement of model fit.



**Running Head:** fMRI assessment of motor learning and escitalopram

128 (3) Post-hoc independent samples *t*-tests were conducted on mean single dose and steady state  
129 scores to assess potential group differences at each critical time point of escitalopram-  
130 administration. Additionally, the delta (difference between mean performance at steady state  
131 compared to baseline) was compared between groups for each outcome via independent samples  
132 *t*-tests. Bayes Factor *t*-tests using the ‘ttestBF’ function in the ‘BayesFactor’ package assessed the  
133 likelihood of the null hypothesis for all independent sample analyses.

134 (4) Pearson’s correlation analyses assessed potential associations between total ASEC scores and  
135 mean lag performance at both single dose and steady state.

136 **fMRI data acquisition:**

137 fMRI data were acquired with gradient-echo echo planar imaging (EPI) on a 3-Tesla  
138 MAGNETOM Verio scanner (Siemens, Erlangen, Germany, 32-channel head-coil, flip angle 90°,  
139 TR=2000 ms, TE=30 ms, field of view=192×192 mm<sup>2</sup>, 30 slices, 64×64 matrix, 3×3×3mm<sup>3</sup>  
140 nominal resolution, 495 volumes, aligned -15° along the anterior to posterior commissure, ~16  
141 minutes). A whole-brain three dimensional T1-weighted Magnetization Prepared Rapid Gradient-  
142 echo (MPRAGE) was also acquired at each time point for co-registration<sup>52</sup> with inversion time,  
143 TI=900 ms, TR=2300 ms, TE=2.98 ms, 1×1×1mm<sup>3</sup> nominal isotropic resolution, ~9 minutes<sup>53</sup>.

144 **fMRI data analysis – Preprocessing and first-level analysis:**

145 Data pre-processing was conducted using SPM12 (v12.7219). Data were realigned, unwarped,  
146 normalized to Montréal Neurological Institute (MNI) space, and smoothed with a Gaussian  
147 kernel (8mm at full-width-half-maximum). First level analysis was performed for baseline, single  
148 dose and steady state separately using a general linear model (GLM) including all three  
149 experimental conditions: learning, simple, and rest. In addition, each analysis contained head-  
150 movement parameters obtained during preprocessing motion correction. Following parameter

**Running Head:** fMRI assessment of motor learning and escitalopram

151 estimation, we generated contrast images specific to sequence learning by specifying the learning  
152 contrast (i.e., the difference between the learning and simple conditions).

153 **fMRI data analysis – Group-level analysis:**

154 Using contrast images obtained at the first level, second level analyses were performed with  
155 SPM12 in Matlab (v9.7). Results were considered statistically significant at a cluster-defining  
156 threshold of  $p < 0.001$  corrected at  $p < 0.05$  using family-wise error (FWE) for multiple  
157 comparisons at the cluster-level.

158 (1) An independent-samples  $t$ -test assessed potential differences in the learning contrast between  
159 groups at baseline.

160 (2) Following baseline comparisons, we assessed changes across time within the escitalopram  
161 group. Using a paired  $t$ -test, we each compared baseline to single dose, baseline to steady state,  
162 and single dose to steady state. Both directions of each  $t$ -statistic were assessed to test for both  
163 increases and decreases in fMRI response during the learning contrast over time.

164 (3) To investigate group differences with respect to results obtained in analyses (2), we specified  
165 a flexible factorial model using factors for *subject* (for repeated measurements), *time* and *group*.  
166 Comparisons from (2) yielding a significant difference were repeated within this model to  
167 validate results from paired  $t$ -tests. Within this model, we tested for an interaction between *group*  
168 and *time*. Additionally, a sensitivity analysis repeated this interaction analysis with an additional  
169 regressor. Two mean behavioral measures for each participant (one for each timepoint) were  
170 entered as nuisance covariates in the GLM<sup>54</sup>. For these behavioral measures, we used the  
171 behavioral sequence-specific learning measure “lag learning-simple score” (LLSS), as calculated  
172 for each participant by subtracting the mean simple condition scores from the mean learning  
173 condition lag scores.

**Running Head:** fMRI assessment of motor learning and escitalopram

174 (4) To visualize mean signal for the learning contrast for each group at baseline, single dose, and  
175 steady state, a series of one-sample *t*-tests was conducted on each group at each timepoint  
176 separately.

177 (5) In order to test for a correlation between motor performance improvement and change in the  
178 learning contrast within the escitalopram group, we used the LLSS as an effect of interest within  
179 a second flexible factorial design<sup>54</sup>. Here, the model was generated using the factors *subject*,  
180 *group*, and *LLSS*.

181 (6) With the aim of testing for a correlation between escitalopram plasma and brain kinetics  
182 during the learning contrast, escitalopram plasma levels were entered as an effect of interest  
183 within a third flexible factorial design<sup>54</sup>, within the escitalopram group, using the factors *subject*,  
184 *group*, and *plasma escitalopram levels*.

185 **Analysis of serum mature BDNF levels:**

186 A one-way repeated measures ANOVA was implemented in R using the ‘Anova’ function to  
187 assess changes in serum mBDNF levels across time. Paired samples *t*-tests in both the  
188 escitalopram and placebo groups compared baseline to steady state within each group, separately.

**Running Head:** fMRI assessment of motor learning and escitalopram

189 **Results:**

190 **Demographics:**

191 No differences were observed between groups in any baseline screening measures. Escitalopram  
192 levels were within the expected range<sup>49</sup> (Table 1).

193 **\*Table 1\***

194 **Sequence-specific motor learning:**

195 We did not find any significant differences between the escitalopram and placebo groups on  
196 behavioral measures of sequence-specific motor learning:

197 (1) Group comparisons of mean performance at baseline did not show any significant group  
198 differences in sequence-specific motor learning behavior ( $t=-0.25, p=0.80$ ).

199 (2) For group comparisons over time, a mixed effects model including a fixed effect of *time* fit  
200 the data significantly better than a random-intercept only model, reflecting a decrease in lag  
201 scores (Table 2). The fixed effect of *group* and the interaction of *time* and *group* did not show a  
202 significant improvement in fit, demonstrating that, while both groups improved in sequence-  
203 specific motor performance over time, they did so comparably (Figure 2).

204 (3) Post-hoc two-sample *t*-tests did not show a significant group difference in mean performance  
205 at either single dose or steady state. Comparisons of the delta scores from baseline to steady state  
206 did not show any significant differences between groups. Bayes Factor analysis of group  
207 comparisons at single dose and steady, as well as the delta, yields moderate evidence in support  
208 of the null hypothesis (Table 2).

209 (4) Additionally, correlation analyses did not show an association between total ASEC scores  
210 with mean behavioral lag scores at either single dose ( $r=-0.03, p=0.8,$ ) or at steady state ( $r=0.11$   
211  $p=0.37$ ), respectively.

212 **\*Figure 2\***

213

214 **\*Table 2\***

215

**Running Head:** fMRI assessment of motor learning and escitalopram

216 **Functional MRI responses during sequence-specific motor learning:**

217 (1) We did not observe any group differences in the learning contrast fMRI responses at baseline.

218 (2) Within the escitalopram group, we found a significant decrease of the learning contrast in  
219 bilateral motor regions (Figure 3, escitalopram panel, blue overlay) when comparing single dose  
220 with steady state. We did not observe any significant increases in whole-brain fMRI signal for  
221 this learning contrast.

222 (3) Comparisons of groups over time reveals decreases in the learning contrast in the left  
223 premotor cortex of the escitalopram group between single dose and steady state that are not  
224 observed in placebo (Figure 3, interaction panel, yellow overlay). A sensitivity analysis  
225 controlling for intra-subject variance in task performance replicates this result, showing a  
226 significant *group by time* interaction with a decrease in the learning contrast from single dose to  
227 steady state in the escitalopram group in the left premotor cortex (Table 3).

228 (4) One-sample *t*-tests across the learning contrast images in each group at each time point show  
229 bilateral activation in both the escitalopram and placebo groups at each of baseline, single dose,  
230 and steady state (Figure 3).

231 **\*Figure 3\***

232

233 **\*Table 3\***

234 (5) Correlation analysis between the change in sequence-specific learning performance with the  
235 fMRI signal change in the learning contrast from single dose to steady state within the  
236 escitalopram group reveals a significant positive correlation in brain regions including the left  
237 premotor cortex (Figure 4; yellow overlay, Supplementary Table 3).

238 (6) Correlational analysis between escitalopram plasma levels and the learning contrast in the  
239 escitalopram group shows a significant negative correlation, with increases in escitalopram  
240 plasma concentration associated with decreases in the learning contrast in the left supplementary  
241 motor area and supramarginal gyrus (Figure 4, Supplementary Table 4).

242 **\*Figure 4\***

**Running Head:** fMRI assessment of motor learning and escitalopram

243 **Analysis of mature BDNF levels:**

244 Analysis of mBDNF levels from baseline to steady state in both groups combined does not reveal  
245 any significant changes over time ( $F(1, 62) = 2.195, p=0.12$ ), and paired  $t$ -tests do not indicate  
246 significant changes from baseline to steady state in either the escitalopram ( $t = -1.23, p=0.22$ ) or  
247 placebo group ( $t = -1.5, p=0.14$ ), respectively.

## **Running Head:** fMRI assessment of motor learning and escitalopram

### 248 **Discussion:**

249 In this randomized controlled interventional study, we investigated whether administration of 20  
250 mg escitalopram improves motor learning performance and alters functional brain response in the  
251 motor network during sequence motor learning. Results show a significant learning effect in  
252 sequence-specific motor performance though this rate of improvement does not differ between  
253 groups. Additionally, we do not observe any significant group differences at any time point, or in  
254 rate of improvement. With fMRI, we find significant escitalopram-induced decreases in the left  
255 cortical premotor response during sequence-specific learning comparing single dose and steady  
256 levels of escitalopram. Moreover, consideration of behavioral performance as a variable of  
257 interest during this phase of learning reveals that these changes in the sequence-specific learning  
258 contrast positively correlate with improvement in motor performance. Finally, we observe a  
259 negative correlation between escitalopram-plasma levels and the fMRI response during the  
260 sequence-specific learning contrast in the left premotor cortex during task-performance,  
261 suggesting a parallel development between escitalopram plasma kinetics and the attenuation of  
262 cortical motor response to sequence-specific motor learning.

263

264 The lack of an effect of SSRI-administration on motor learning performance differs from  
265 previous findings in healthy volunteers<sup>31-33</sup>. These studies, however, were neither powered nor  
266 pre-registered to test this as an *a-priori* hypothesis, with six healthy volunteers for five different  
267 behavioral tests and one fMRI experiment<sup>31,32</sup> and nineteen volunteers for six different behavioral  
268 assessments<sup>33</sup>. Additionally, we administered escitalopram, and chose a task that may be less  
269 cognitively demanding due to repetitive isotonic contractions<sup>55</sup>, possibly creating earlier ceiling  
270 effects in healthy adults. These previous findings could be specific to paroxetine, require tasks  
271 with more spatial and coordination-oriented sensorimotor components, or may only become  
272 apparent after several weeks of administration. Nevertheless, given that we administered the

**Running Head:** fMRI assessment of motor learning and escitalopram

273 SSRI with the highest transporter selectivity<sup>56</sup>, employed a task that reliably measures sequence  
274 motor learning<sup>40</sup>, and tested a sample well-powered to detect robust effect sizes, it is unlikely that  
275 this discrepancy is due to the choice of SSRI or motor paradigm alone. Furthermore, our  
276 exploratory analysis of mature BDNF levels in plasma did not reveal any significant changes  
277 associated with improved motor learning performance in either group. While this is consistent  
278 with findings of improved motor performance in healthy volunteers to be unrelated to peripheral  
279 BDNF levels<sup>57</sup>, evidence supportive of an association between motor skill learning and increased  
280 BDNF levels have also been reported<sup>58</sup>. While future studies should assess potential SSRI  
281 modulation of motor learning with additional paradigms, our results do not support a beneficial  
282 effect of SSRI-administration on motor learning performance in health.

283

284 We do report evidence supportive of our second hypothesis however, with significant decreases  
285 in functional responses in left premotor cortex during sequence specific motor learning, relative  
286 to placebo (Figure 3). While both increases and decreases in functional brain responses underlie  
287 motor learning<sup>59</sup>, this pattern is dependent on differential stages of learning and is defined by  
288 multiple parallel processes<sup>60-62</sup>. Early fast learning is accompanied by rapid improvements in  
289 performance, followed by slow learning that characterizes a more consolidatory phase<sup>63,64</sup>.  
290 Patterns of functional responses observed during this phase are also influenced by the type of  
291 task, with explicit learning of repetitive and unchanging sequences hypothesized to lead to faster  
292 automation of performance<sup>61,65,66</sup> and a subsequent reduction in cognitive load needed for task  
293 completion. Given the predictable repetition of the learning sequence on our task and the timing  
294 of our assessments, it is possible that the observed escitalopram-induced decreases in the learning  
295 contrast reflect this automation of responses and subsequent consolidation of sequence learning.



**Running Head:** fMRI assessment of motor learning and escitalopram

296 Such a neural consolidation process in response to 1 week of escitalopram-intake is consistent  
297 with a recent conceptual model of SSRI influences on post-stroke recovery<sup>67</sup>. The authors  
298 propose that acute SSRI exposure changes the excitatory and inhibitory balance with increases in  
299 excitatory signaling, allowing for the remodeling of cortical pathways<sup>67</sup>. Subsequent SSRI  
300 exposure leads to a reset in homeostasis with a heightening of  $\gamma$ -aminobutyric acid (GABA)  
301 tone<sup>67</sup>, allowing for remodeled pathways to become engrained as task performance continues.  
302 Further support for this interpretation stems from studies identifying an inverse relationship  
303 between cortical GABA concentrations and functional brain responses<sup>68,69</sup> and SSRI  
304 administration has been shown to increase cortical GABA levels in rodents<sup>70</sup> and healthy  
305 volunteers<sup>71</sup>. Finally, the observation that the escitalopram-induced decrease in the learning  
306 contrast is negatively associated with escitalopram kinetics occurs in a timeframe consistent with  
307 that typically required for 5-HT<sub>1A</sub> autoreceptor desensitization<sup>72</sup>, which could also modulate  
308 effective enhancement of cortical GABAergic tone<sup>73</sup>. In summary, it is possible that this  
309 escitalopram-induced decrease in premotor response in the learning contrast reflects more  
310 effective neural task processing, relative to placebo, in a region central to temporally and  
311 visually-oriented motor learning and planning<sup>74-77</sup>. This interpretation is consistent with the  
312 hypothesis of an SSRI-induced window of experience-dependent plasticity as an attenuator of  
313 neural efficiency during performance<sup>25,26</sup>.

314

315 An alternative explanation of this finding is a habituation effect of neural responses during  
316 repetitive sequence-specific motor learning that may be emphasized by escitalopram  
317 administration. While we report a significant three-way interaction for brain, task, and group  
318 (Figure 4), this effect is limited to the comparison between a single dose and steady state and in  
319 the escitalopram group only, despite the observation that both groups successfully improve  
320 performance over time. It is possible that the neural responses during task performance in the

**Running Head:** fMRI assessment of motor learning and escitalopram

321 placebo group reflects a simpler order effect, whereby neural responses adapt incrementally,  
322 rather than via an adaptive plasticity mechanism. Integration of more direct measures of cortical  
323 excitation and inhibition can allow for more fine-grained investigations into acute and subacute  
324 SSRI-effects.

325

326 Nevertheless, there are some limitations to consider when interpreting these results. We  
327 acknowledge that the initial strong learning effect may have masked more subtle modulation of  
328 performance with escitalopram at a later training session. Though a known limitation of this task,  
329 we chose the SPFT for this well-established and reliable learning effect. While performance  
330 reaches a ceiling during the fourth and fifth sessions, as described previously<sup>40</sup>, we still observe a  
331 considerable change in performance after the administration of the single dose and subsequent  
332 training sessions, thus maintaining the falsifiability of our primary hypothesis. Second, our results  
333 may not generalize to males or older adults as our sub-sample consists only of females with  
334 standardized downregulation of ovarian hormones. This was a deliberate *a-priori* restriction to  
335 eliminate confounds such as sex-differences<sup>33</sup> and fluctuating endogenous hormones<sup>78</sup> on  
336 environmental learning and escitalopram responsivity. Third, other studies have gradually  
337 increased escitalopram doses for pharmaco-fMRI protocols in healthy participants<sup>79</sup> to minimize  
338 adverse effects. We chose a fixed dose of 20 mg to reliably block 80 % of 5-HTT<sup>37</sup>, an approach  
339 previously well tolerated<sup>28</sup>. While four participants discontinued protocol because of adverse  
340 effects in the escitalopram group, this was also the case for two placebo participants, and there  
341 was no group difference in self-reported side effects at steady state. Finally, fMRI provides an  
342 indirect measure of neural activity, which is susceptible to non-neural changes such as vascular  
343 uncoupling. Given the functional specificity of the premotor cortex, it is unlikely that these  
344 findings are solely driven by changes in global blood flow. We cannot, however, identify  
345 underlying molecular mechanisms, which require quantitative measures such as MR-

**Running Head:** fMRI assessment of motor learning and escitalopram

346 spectroscopy measures of GABA and glutamate or [<sup>11</sup>C]UCB-J positron emission tomography, a  
347 recently developed technique for *in vivo* imaging of synaptic plasticity<sup>80,81</sup>.

348

349 In conclusion, this is the first study to investigate the effect of steady escitalopram administration  
350 on motor learning in an established sequential motor learning paradigm and the associated brain  
351 response in a sufficiently powered sample. In this pre-registered, randomized, controlled,  
352 interventional study, we do not find evidence in support of improved performance in response to  
353 1 week of escitalopram-intake during sequence-specific motor training. A major difference we  
354 observe between groups is a decrease in premotor cortical responses during sequence-specific  
355 learning performance contrasting single dose and steady drug state. Considering previous  
356 findings on sequential motor learning and associated neural correlates in the motor network, less  
357 premotor response during similar performance may suggest more effective neural processing and  
358 greater consolidation of performance<sup>64</sup>. By combining escitalopram administration and sequence-  
359 specific motor training for one week, we provide the first empirically tested framework for  
360 assessing SSRI-effects on human adaptive motor plasticity in health. Our paradigm and findings  
361 may help disentangle the seemingly contradictory results between preclinical models and recent  
362 clinical trials and represent an important milestone towards understanding the role of SSRIs in  
363 human motor learning.

**Running Head:** fMRI assessment of motor learning and escitalopram

**Acknowledgements:**

We thank Heike Schmidt-Duderstedt and Kerstin Flake for assisting with preparation of the figures and Dr. Kristin Ihle for her assistance with medical supervision of all participants during the experiments, and PD Dr. Veronica Witte for statistical discussion.

**Running Head:** fMRI assessment of motor learning and escitalopram

**Authors' Contributions Statement:**

**ENM:** Conceptualization, Investigation, Methodology, Formal analysis, Writing - original draft, Writing - review & editing, Visualization, Funding acquisition

**KM:** Conceptualization, Methodology, Formal analysis, Writing - review & editing, Visualization

**NB:** Conceptualization, Methodology

**MB:** Formal analysis, Writing - review & editing

**FAP:** Formal analysis, Writing - review & editing

**AP:** Methodology

**CJ:** Methodology, Formal analysis

**US:** Conceptualization, Methodology

**GZ:** Conceptualization, Methodology

**RR:** Formal analysis, Writing - review & editing

**BS:** Writing - review & editing

**VVN:** Writing - review & editing

**HEM:** Methodology, Writing - review & editing

**AV:** Writing - review & editing

**JS:** : Conceptualization, Investigation, Methodology, Writing - review & editing, Visualization, Funding acquisition

**Running Head:** fMRI assessment of motor learning and escitalopram

**Competing Interests:**

The authors declare that no competing interests exist.

**Funding:**

This research was supported by the FAZIT Foundation to ENM and The Branco Weiss Fellowship – Society in Science to JS and the Max Planck Society.

## Running Head: fMRI assessment of motor learning and escitalopram

### References:

1. Diedrichsen, J., Kornysheva, K. (2015). Motor skill learning between selection and execution. *Trends Cogn Sci.* 19(4):227-33. doi: 10.1016/j.tics.2015.02.003.
2. Molina-Luna K., Pektanovic, A., Röhrich, S., Hertler, B., Schubring-Giese, M., Rioult-Pedotti, MS., Luft, A.R. (2009). Dopamine in motor cortex is necessary for skill learning and synaptic plasticity. *PLoS One.* 17;4(9):e7082. doi:10.1371/journal.pone.0007082.
3. Rioult-Pedotti, MS., Pektanovic, A., Atiemo, CO., Marshall, J., Luft, AR. (2015). Dopamine Promotes Motor Cortex Plasticity and Motor Skill Learning via PLC Activation. *PLoS One.* 10(5):e0124986. doi: 10.1371/journal.pone.0124986.
4. Vitrac, C., Benoit-Marand, M. (2017) Monoaminergic Modulation of Motor Cortex Function. *Front. Neural Circuits* 11:72. doi: 10.3389/fncir.2017.00072.
5. Flöel, A., Breitenstein, C., Hummel, F., Celnik, P., Gingert, C., Sawaki, L., Knecht, S., Cohen, LG. (2005). Dopaminergic influences on formation of a motor memory. *Ann Neurol.* 58(1):121-30. doi:10.1002/ana.20536.
6. Flöel, A., Garraux, G., Xu, B., Breitenstein, C., Knecht, S., Herscovitch, P., Cohen, LG. (2008). Levodopa increases memory encoding and dopamine release in the striatum in the elderly. *Neurobiol Aging.* 29(2):267-79. doi:10.1016/j.neurobiolaging.2006.10.009
7. Magrinelli, F., Picelli, A., Tocco, P., Federico, A., Roncari, L., Smania, N., Zanette, G., Tamburin, S. (2016). Pathophysiology of Motor Dysfunction in Parkinson's Disease as the Rationale for Drug Treatment and Rehabilitation. *Parkinsons Dis.* doi:10.1155/2016/9832839
8. Maya Vetencourt, JF., Sale, A., Viegi, A., Baroncelli, L., De Pasquale, R., O'Leary, OF., Castrén, E., Maffei, L. (2008). The antidepressant fluoxetine restores plasticity in the adult visual cortex. *Science,* 320(5874), 385-388. doi:10.1126/science.1150516.
9. Chollet, F., Tardy, J., Albucher, JF., Thalamas, C., Berard, E., Lamy, C., Bejot, Y., Deltour, S., Jaillard, A., Niclot, P., Guillon, B., Moulin, T., Marque, P., Pariente J, Arnaud, C. Loubinoux, I. (2011). Fluoxetine for motor recovery after acute ischaemic stroke (FLAME): a randomised placebo-controlled trial. *Lancet Neurol,* 10(2), 123-130. doi:10.1016/S1474-4422(10)70314-8.
10. Cipriani, A., Furukawa, TA., Salanti, G., Chaimani, A., Atkinson, LZ., Ogawa, Y., Leucht, S., Ruhe, HG., Turner, EH., Higgins, JPT., Egger, M., Takeshima, N., Hayasaka, Y., Imai, H., Shinohara, K., Tajika, A., Ioannidis, JPA., Geddes, JR. (2018). Comparative efficacy and acceptability of 21 antidepressant drugs for the acute treatment of adults with major depressive disorder: a systematic review and network meta-analysis. *Lancet.* 7;391(10128):1357-1366. doi: 10.1016/S0140-6736(17)32802-7.
11. Hackett, ML., Anderson, CS., House, A., Halteh, C. (2006). Interventions for preventing depression after stroke. *Cochrane Database Syst Rev.* 16;(3):CD003689. doi: 10.1002/14651858.CD003689.pub3.

**Running Head:** fMRI assessment of motor learning and escitalopram

12. Acler, M., Robol, E., Fiaschi, A., Manganotti, P. (2009). A double blind placebo RCT to investigate the effects of serotonergic modulation on brain excitability and motor recovery in stroke patients. *Journal of Neurology* 256(7):1152-8. doi: 10.1007/s00415-009-5093-7.
13. Mead, GE., Hsieh, CF., Hackett, M. (2013). Selective serotonin reuptake inhibitors for stroke recovery. *JAMA*. 310(10):1066-7. doi: 10.1001/jama.2013.107828.
14. Lim, CM., Kim, SW., Park, JY., Kim, C., Yoon, SH., Lee, JK. (2009). Fluoxetine affords robust neuroprotection in the postischemic brain via its anti-inflammatory effect. *J Neurosci Res*. 87(4):1037-45. doi: 10.1002/jnr.21899.
15. Tynan, RJ., Weidenhofer, J., Hinwood, M., Cairns, MJ., Day, TA., Walker, FR. (2012). A comparative examination of the anti-inflammatory effects of SSRI and SNRI antidepressants on LPS stimulated microglia. *Brain Behav Immun*. 26(3):469-79. doi: 10.1016/j.bbi.2011.12.011.
16. Schmidt, HD., Duman, RS. (2007). The role of neurotrophic factors in adult hippocampal neurogenesis, antidepressant treatments and animal models of depressive-like behavior. *Behav Pharmacol*. 18(5-6):391-418. doi: 10.1097/FBP.0b013e3282ee2aa8
17. Malberg, JE., Eisch, AJ., Nestler, EJ., Duman, RS. (2000). Chronic antidepressant treatment increases neurogenesis in adult rat hippocampus. *J Neurosci*. 15;20(24):9104-10. doi: <https://doi.org/10.1523/JNEUROSCI.20-24-09104.2000>.
18. Lyons, L., ElBeltagy, M., Umka, J., Markwick, R., Startin, C., Bennett, G., Wigmore, P. (2011). Fluoxetine reverses the memory impairment and reduction in proliferation and survival of hippocampal cells caused by methotrexate chemotherapy. *Psychopharmacology (Berl)*. 215(1):105-15. doi: 10.1007/s00213-010-2122-2.
19. Cooke, JD., Grover, LM., Spangler, PR. (2009). Venlafaxine treatment stimulates expression of brain-derived neurotrophic factor protein in frontal cortex and inhibits long-term potentiation in hippocampus. *Neuroscience*. 162(4):1411-9. doi: 10.1016/j.neuroscience.2009.05.037.
20. Pälvimäki, EP., Laakso, A., Kuoppamäki, M., Syvälahti, E., Hietala, J. (1994). Up-regulation of  $\beta$ 1-adrenergic receptors in rat brain after chronic citalopram and fluoxetine treatments. *Psychopharmacology*. 115: 543. <https://doi.org/10.1007/BF02245579>
21. Yan, Z. (2002). Regulation of GABAergic inhibition by serotonin signalling in prefrontal cortex. *Molecular Neurobiology* 26(2-3) 203-216. doi: 10.1385/MN:26:2-3:203
22. Choi, HC., Kim, YI., Song, HK., Kim, JE., Kim, DS., Kang, TC. (2010). Effects of selective serotonin reuptake inhibitors on GABAergic inhibition in the hippocampus of normal and pilocarpine induced epileptic rats. *Brain Res*. 1357:131-41. doi: 10.1016/j.brainres.2010.08.010.



**Running Head:** fMRI assessment of motor learning and escitalopram

23. Mlinar, B., Stocca, G., Corradetti, R. (2015). Endogenous serotonin facilitates hippocampal long-term potentiation at CA3/CA1 synapses. *J Neural Transm(Vienna)*. 122(2):177-85. doi: 10.1007/s00702-014-1246-7.
24. Batsikadze, G., Paulus, W., Kuo, MF., Nitsche, MA. (2013). Effect of serotonin on paired associative stimulation-induced plasticity in the human motor cortex. *Neuropsychopharmacology*, 38(11), 2260-2267. doi:10.1038/npp.2013.127.
25. Castrén, E. (2005). Is mood chemistry? *Nat Rev Neurosci*, 6(3), 241-246. doi:10.1038/nrn1629
26. Castrén, E. (2013). Neuronal network plasticity and recovery from depression. *JAMA Psychiatry*, 70(9), 983-989. doi:10.1001/jamapsychiatry.2013.1
27. Siepmann, T., Penzlin, A.I., Kepplinger, J., Illigens, BM., Weidner, K., Reichmann, H., Barlind, K. (2015). Selective serotonin reuptake inhibitors to improve outcome in acute ischemic stroke: possible mechanisms and clinical evidence. *Brain Behav*. 23;5(10): e00373. doi: 10.1002/brb3.373.
28. Schaefer, A., Burmann, I., Regenthal, R., Arélin, K., Barth, C., Pampel, A., Villringer, A., Margulies, DS., Sacher, J. (2014). Serotonergic modulation of intrinsic functional connectivity. *Current Biology*, 24(19), 2314-2318. doi: 10.1016/j.cub.2014.08.024.
29. Knott, VJ., Howson, AL., Perugini, M., Ravindran, AV., & Young, SN. (1999). The Effect of Acute Tryptophan Depletion and Fenfluramine on Quantitative EEG and Mood in Healthy Male Subjects. *Biological Psychiatry*; (46) 229–238.
30. Loubinoux, I., Boulanouar, K., Ranjeva, JP., Carel, C., Berry, I., Rascol, O., Celsis, P., Chollet, F. (1999). Cerebral functional magnetic resonance imaging activation modulated by a single dose of the monoamine neurotransmission enhancers fluoxetine and fenozolone during hand sensorimotor tasks. *J Cereb Blood Flow Metab*. 19(12):1365-75. doi: 10.1097/00004647-199912000-00010
31. Loubinoux, I., Pariente, J., Boulanouar, K., Carel, C., Manelfe, C., Rascol, O., Celsis, P., Chollet, F. (2002a). A single dose of the serotonin neurotransmission agonist paroxetine enhances motor output: double-blind, placebo-controlled, fMRI study in healthy subjects. *Neuroimage*, 15(1), 26-36. doi:10.1006/nimg.2001.0957.
32. Loubinoux, I., Pariente, J., Rascol, O., Celsis, P., Chollet, F. (2002b). Selective serotonin reuptake inhibitor paroxetine modulates motor behavior through practice. A double-blind, placebo-controlled, multi-dose study in healthy subjects. *Neuropsychologia*. 40(11):1815-21.
33. Loubinoux, I., Tombari, D., Pariente, J., Gerdelat-Mas, A., Franceries, X., Cassol, E., Rascol, O., Pastor, J., Chollet, F. (2005). Modulation of behavior and cortical motor activity in healthy subjects by a chronic administration of a serotonin enhancer. *Neuroimage*. 27(2):299-313. doi:10.1016/j.neuroimage.2004.12.023
34. Kraglund, KL., Mortensen, JK., Damsbo, AG., Modrau, B., Simonsen, SA., Iversen, HK., Madsen, M., Grove, EL., Johnsen, SP., Andersen, G. (2018). Neuroregeneration and

**Running Head:** fMRI assessment of motor learning and escitalopram

- Vascular Protection by Citalopram in Acute Ischemic Stroke (TALOS). *Stroke*. 49(11):2568-2576. doi:10.1161/STROKEAHA.117.020067.
35. FOCUS Trial Collaboration. (2019). Effects of fluoxetine on functional outcomes after acute stroke (FOCUS): a pragmatic, double-blind, randomised, controlled trial. *Lancet*. 393(10168):265-274. doi: 10.1016/S0140-6736(18)32823-X.
36. van der Worp, BH. (2019). Fluoxetine and recovery after stroke. *Lancet*. 393(10168):206-207. doi: 10.1016/S0140-6736(18)32983-0.
37. Klein, N., Sacher, J., Geiss-Granadia, T., Attarbaschi, T., Mossaheb, N., Lanzenberger, R., Pötzi, C., Holik, A., Spindelegger, C., Asenbaum, S., Dudczak, R., Tauscher, J., Kasper S. (2006). In vivo imaging of serotonin transporter occupancy by means of SPECT and [<sup>123</sup>I]ADAM in healthy subjects administered different doses of escitalopram or citalopram. *Psychopharmacology (Berl)*. 188(3):263-72. doi:10.1007/s00213-006-0486-0.
38. Kasper, S., Spadone C., Verpillat P., Angst J. (2006). Onset of action of escitalopram compared with other antidepressants: results of a pooled analysis. *Int Clin Psychopharmacol*. 21(2):105-10.
39. Sanchez, C., Reines, EH., Montgomery, SA. (2014). A comparative review of escitalopram, paroxetine, and sertraline: Are they all alike? *Int Clin Psychopharmacol*. 29(4):185-96. doi: 10.1097/YIC.0000000000000023.
40. Gryga, M., Taubert, M., Dukart, J., Vollmann, H., Conde, V., Sehm, B., Villringer, A., Ragert, P. (2012). Bidirectional gray matter changes after complex motor skill learning. *Front Syst Neurosci*, 6:37. doi:10.3389/fnsys.2012.00037
41. Pasqualetti G., Gori G., Blandizzi C., Del Tacca, M. (2010). Healthy volunteers and early phases of clinical experimentation. *Eur J Clin Pharmacol*.;66(7):647-53. doi: 10.1007/s00228-010-0827-0.
42. Karakunnel, JJ., Bui, N., Palaniappan, L., Schmidt, KT., Mahaffey, KW., Morrison, B., Figg, WD., Kummar, S. (2018). Reviewing the role of healthy volunteer studies in drug development. *J Transl Med*. 4;16(1):336. doi: 10.1186/s12967-018-1710-5.
43. van Dyck, CH., Malison, RT., Seibyl, JP., Laruelle, M., Klumpp, H., Zoghbi, SS., Baldwin, RM., Innis, RB. (2000) Age-related decline in central serotonin transporter availability with [(123)I]beta-CIT SPECT. *Neurobiol Aging*. 21(4):497-501. doi: 10.1016/s0197-4580(00)00152-4.
44. Hampson, E. & Kimura D. (1988). Reciprocal effects of hormonal fluctuations on human motor and perceptual-spatial skills. *Behav Neurosci*. 102(3):456-9. doi:10.1037//0735-7044.102.3.456
45. Barth, C., Villringer, A., Sacher, J. (2015). Sex hormones affect neurotransmitters and shape the adult female brain during hormonal transition periods. *Front Neurosci*. 9:37. doi: 10.3389/fnins.2015.00037.

**Running Head:** fMRI assessment of motor learning and escitalopram

46. LeGates, T., Kvarita, MD., Thompson, SM. (2019). Sex differences in antidepressant efficacy. *Neuropsychopharmacology*;44(1):140-154. doi: 10.1038/s41386-018-0156-z.
47. Uher, R., Farmer, A., Henigsberg, N., Rietschel, M., Mors, O., Maier, W., Kozel, D., Hauser, J., Souery, D., Placentino, A., Strohmaier, J., Perroud, N., Zobel, A., Rajewska-Rager, A., Dernovsek, MZ., Larsen, E.R., Kalember, P., Giovannini, C., Barreto, M., McGuffin, P., Aitchison, KJ. (2009). Adverse reactions to antidepressants. *Br J Psychiatry*. 195(3):202-10. doi: 10.1192/bjp.bp.108.061960.
48. Rao, N. (2007). The Clinical Pharmacokinetics of Escitalopram. *Clinical Pharmacokinetics* 46(4):281-90. DOI: 10.2165/00003088-200746040-00002.
49. R Core Team (2013). R: A language and environment for statistical computing. R Foundation for Statistical Computing, Vienna, Austria.
50. Faul, F., Erdfelder, E., Lang, AG, Buchner A. (2007). G\*Power 3: a flexible statistical power analysis program for the social, behavioral, and biomedical sciences. *Behav Res Methods*. 39(2):175-91. doi:10.3758/bf03193146.
51. Iglewicz, B., Banerjee, S. (2001). A simple univariate outlier identification procedure. Proceedings of the Annual Meeting of the American Statistical Association.
52. Mugler, JP., 3rd, Brookeman, J.R. (1990). Three-dimensional magnetization-prepared rapid gradient-echo imaging (3D MP RAGE). *Magn Reson Med*;15(1):152-157. doi: 10.1002/mrm.1910150117.
53. Streitbürger, DP., Pampel, A., Krueger, G., Lepsien, J., Schroeter, ML., Mueller, K., Möller, HE. (2014). Impact of image acquisition on voxel-based-morphometry investigations of age-related structural brain changes. *Neuroimage*. 15; 87:170-82. doi:10.1016/j.neuroimage.2013.10.051.
54. Holiga, Š., Mueller, K., Möller, HE., Sieger, T., Schroeter, ML., Vymazal, J. (2013). Motor matters: tackling heterogeneity of Parkinson's disease in functional MRI studies. *PLoS One*. 2013;8:e56133. doi.org/10.1371/journal.pone.0056133.
55. Hardwick, RM., Rottschy, C., Miall, RC., Eickhoff, SB. (2013). A quantitative meta-analysis and review of motor learning in the human brain. *Neuroimage*. 15; 67:283-97. doi: 10.1016/j.neuroimage.2012.11.020.
56. Owens, MJ., Knight, DL., Nemeroff, CB. (2001). Second-generation SSRIs: human monoamine transporter binding profile of escitalopram and R-fluoxetine. *Biol Psychiatry*. 50(5):345-50. doi: 10.1016/s0006-3223(01)01145-3
57. Baird, JF., Gaughan, ME., Saffer, HM., Sarzynski, MA., Herter, TM., Fritz, SL., den Ouden, DB., Stewart, J.C. (2018). The effect of energy-matched exercise intensity on brain-derived neurotrophic factor and motor learning. *Neurobiol Learn Mem*. 156:33-44. doi: 10.1016/j.nlm.2018.10.008.
58. Grégoire, CA., Berryman, N., St-Onge, F., Vu, TTM., Bosquet, L., Arbour, N., Bherer, L. (2019). Gross Motor Skills Training Leads to Increased Brain-Derived Neurotrophic

**Running Head:** fMRI assessment of motor learning and escitalopram

- Factor Levels in Healthy Older Adults: A Pilot Study. *Front Physiol.* 10: 410. doi:10.3389/fphys.2019.00410.
59. Wymbs, FN., & Grafton, ST. (2014). The Human Motor System Supports Sequence-Specific Representations over Multiple Training-Dependent Timescales. *Cerebral Cortex*, 25(11) 4213–4225, doi: <https://doi.org/10.1093/cercor/bhu144>
60. Penhune, VB., Steele, CJ. (2012). Parallel contributions of cerebellar, striatal and M1 mechanisms to motor sequence learning. *Behav Brain Res.* 15;226(2):579-91. doi: 10.1016/j.bbr.2011.09.044.
61. Toni, I., Krams, M., Turner, R., Passingham, RE. (1998). The time course of changes during motor sequence learning: a whole-brain fMRI study. *Neuroimage.* 8(1):50-61. doi:<https://doi.org/10.1006/nimg.1998.0349>
62. Luft, AR., Buitrago, MM. (2005). Stages of motor skill learning. *Mol Neurobiol* 32(3):205-16. doi:10.1385/MN:32:3:205.
63. Karni, A., Meyer, G., Rey-Hipolito, C., Jezzard, P., Adams, MM., Turner. R., Ungerleider, LG. (1998). The acquisition of skilled motor performance: fast and slow experience-driven changes in primary motor cortex. *PNAS*;3;95(3):861-8. doi: 10.1073/pnas.95.3.861.
64. Hotermans, C., Peigneux, P., Maertens de Noordhout, A., Moonen, G., Maquet, P. (2006). Early boost and slow consolidation in motor skill learning. *Learn Mem.*;13(5):580-3. doi:10.1101/lm.239406
65. Poldrack, RA., Sabb, FW., Foerde, K., Tom, SM., Asarnow, RF., Bookheimer, SY., Knowlton, BJ. (2005). The neural correlates of motor skill automaticity. *J Neurosci.* 25(22):5356-64. doi: <https://doi.org/10.1523/JNEUROSCI.3880-04.2005>
66. Yang, J. (2015). The influence of motor expertise on the brain activity of motor task performance: A meta-analysis of functional magnetic resonance imaging studies. *Cogn Affect Behav Neurosci.* 15(2):381-94. doi: 10.3758/s13415-014-0329-0.
67. Schneider CL, Majewska AK, Busza A, Williams ZR, Mahon BZ, Sahin B. (2019). Selective serotonin reuptake inhibitors for functional recovery after stroke: Similarities with the critical period and the role of experience-dependent plasticity. *J Neurol.* 1-7. doi: 10.1007/s00415-019-09480-0
68. Stagg, CJ., Bachtiar, V., Johansen-Berg, H. (2011). The role of GABA in human motor learning. *Curr Biol.* 21(6):480-4. doi: 10.1016/j.cub.2011.01.069.
69. Stagg, CJ., Bachtiar, V., Amadi, U., Gudberg, CA., Ilie, AS., Sampaio-Baptista, C., O'Shea, J., Woolrich, M., Smith, SM., Filippini, N., Near, J., Johansen-Berg H. (2014). Local GABA concentration is related to network-level resting functional connectivity. *Elife.* 25;3:e01465. doi: 10.7554/eLife.01465.
70. Chen, Z., Silva, AC., Yang, J., Shen, J. (2005). Elevated endogenous GABA level correlates with decreased fMRI signals in the rat brain during acute inhibition of GABA transaminase. *J Neurosci Res.* 79(3):383-91.

**Running Head:** fMRI assessment of motor learning and escitalopram

71. Bhagwagar, Z., Wylezinska, M., Taylor, M., Jezzard, P., Matthews, PM., Cowen, PJ. (2004). Increased brain GABA concentrations following acute administration of a selective serotonin reuptake inhibitor. *Am J Psychiatry*. 161(2):368-70. doi: 10.1176/appi.ajp.161.2.368
72. El Mansari, M., Sánchez, C., Chouvet, G., Renaud, B., Haddjeri, N. (2005). Effects of acute and long-term administration of escitalopram and citalopram on serotonin neurotransmission: an in vivo electrophysiological study in rat brain. *Neuropsychopharmacology*. 30(7):1269-77. doi:10.1038/sj.npp.1300686
73. Lladó-Pelfort, L., Santana, N., Ghisi, V., Artigas, F., Celada, P. (2012). 5-HT1A receptor agonists enhance pyramidal cell firing in prefrontal cortex through a preferential action on GABA interneurons. *Cereb Cortex*. 22(7):1487-97. doi: 10.1093/cercor/bhr220.
74. Karim, HT., Huppert, TJ., Erickson, KI., Wollam, ME., Sparto, PJ., Sejdić, E., Van Swearingen, JM. (2017). Motor sequence learning-induced neural efficiency in functional brain connectivity. *Behav Brain Res*. 15;319:87-95. doi: 10.1016/j.bbr.2016.11.021.
75. Mushiake, H., Inase, M., Tanji, J. (1991). Neuronal activity in the primate premotor, supplementary, and precentral motor cortex during visually guided and internally determined sequential movements. *J Neurophysiol*;66(3):705-18.
76. Halsband, U., Ito, N., Tanji, J., Freund, HJ. (1993). The role of premotor cortex and the supplementary motor area in the temporal control of movement in man. *Brain*;116 (Pt 1):243-66. doi:10.1093/brain/116.1.243.
77. Kalaska, JF., Crammond, DJ. (1995). Deciding not to GO: neuronal correlates of response selection in a GO/NOGO task in primate premotor and parietal cortex. *Cereb Cortex*.;5(5):410-28. doi:10.1093/cercor/5.5.410.
78. Bianchini, F., Verde, P., Colangeli, S., Boccia, M., Strollo, F., Guariglia, C., Bizzarro, G., Piccardi, L. (2018). Effects of oral contraceptives and natural menstrual cycling on environmental learning. *BMC Womens Health*. 18(1):179. doi: 10.1186/s12905-018-0671- 4.
79. Henry, ME., Lauriat, TL., Lowen, SB., Churchill, JH., Hodgkinson, CA., Goldman, D., Renshaw, PF. (2013). Effects of citalopram and escitalopram on fMRI response to affective stimuli in healthy volunteers selected by serotonin transporter genotype. *Psychiatry Res*. 213(3): 217–224. doi:10.1016/j.psychres.2013.05.008.
80. Finnema, SJ., Nabulsi, NB., Eid, T., Detyniecki, K., Lin, SF., Chen, MK., Dhaher, R., Matuskey, D., Baum, E., Holden, D., Spencer, DD., Mercier, J., Hannestad, J. Huang, Y., Carson, RE. Imaging synaptic density in the living human brain. *Sci Transl Med*. 8(348):348ra96. doi: 10.1126/scitranslmed.aaf6667.
81. Chen, MK., Mecca, AP., Naganawa, M., Finnema, SJ., Toyonaga, T., Lin, SF., Najafzadeh, S., Ropchan, J., Lu, Y., McDonald, JW., Michalak, HR., Nabulsi, NB., Arnsten, AFT., Huang, Y., Carson, RE, van Dyck, CH. (2018). Assessing Synaptic

**Running Head:** fMRI assessment of motor learning and escitalopram

Density in Alzheimer Disease With Synaptic Vesicle Glycoprotein 2A Positron  
Emission Tomographic Imaging. *JAMA Neurol.* 75(10):1215-1224. doi:  
10.1001/jamaneurol.2018.1836.

**Running Head:** fMRI assessment of motor learning and escitalopram

**Figures & Figure Legends:**

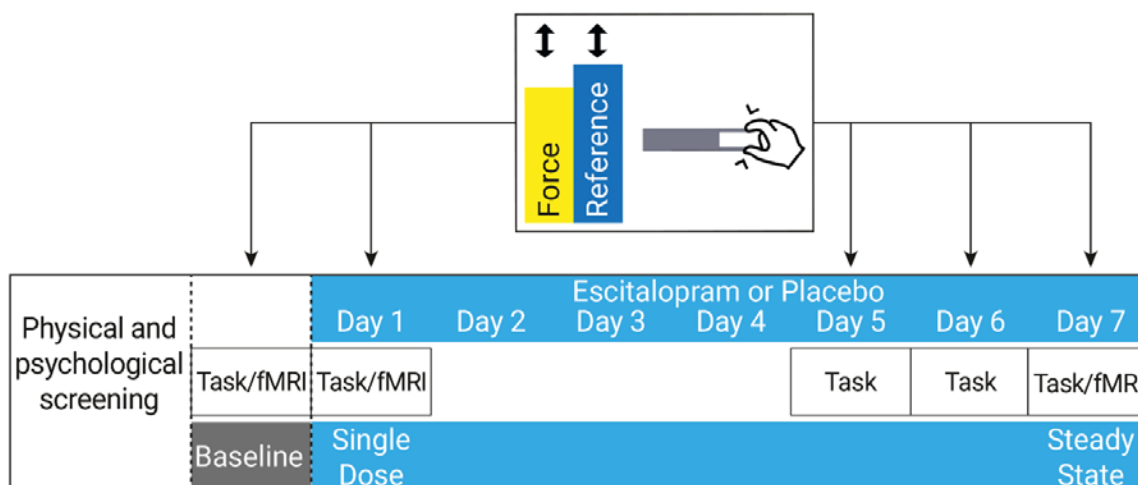

**Figure 1. Study design and task:** Following baseline, escitalopram or placebo administration took place for 7 consecutive days. Post baseline, motor training took place at single dose (first day), days 5 and 6, and at steady state (day 7). Motor training on days 5 and 6 was completed outside the scanner. fMRI data were acquired at baseline, single dose, and steady state. Task = Sequential Pinch Force Task, fMRI = Functional Magnetic Resonance Imaging, Force = the yellow bar controlled by the participants, the rise and fall of which was required to match the rise and fall of the blue (reference bar, i.e., the bar controlled by a computer).



## Running Head: fMRI assessment of motor learning and escitalopram

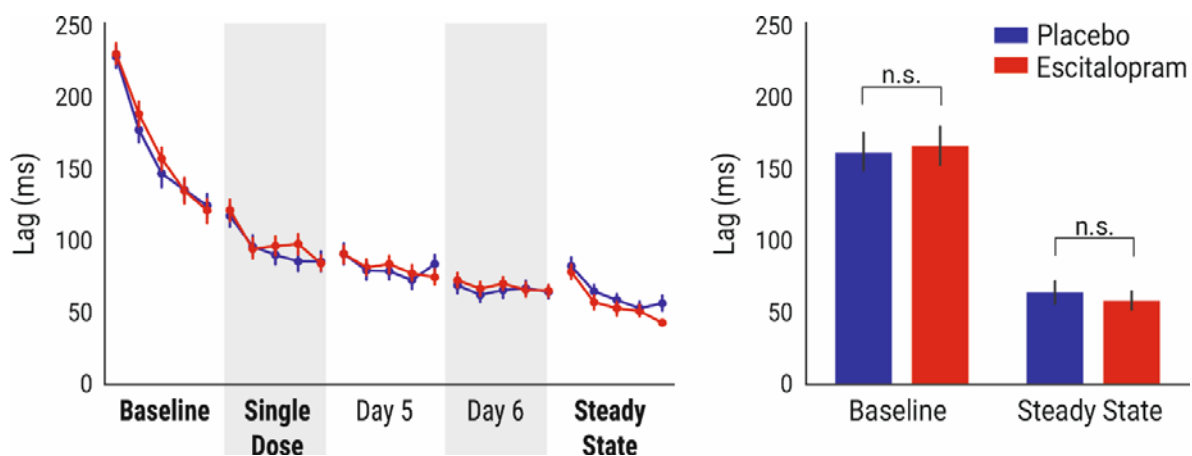

**Figure 2. Sequential motor learning:** **Left:** Significant improvements in lag scores over 5 days of sequential motor training across both escitalopram and placebo. However, despite a significant learning effect, we observed no significant group differences in performance, nor did we observe an interaction effect. **Right:** Comparison of the rate of change between baseline and steady state yield no significant group differences. Bold fonts indicate training completed in the scanner.



## Running Head: fMRI assessment of motor learning and escitalopram

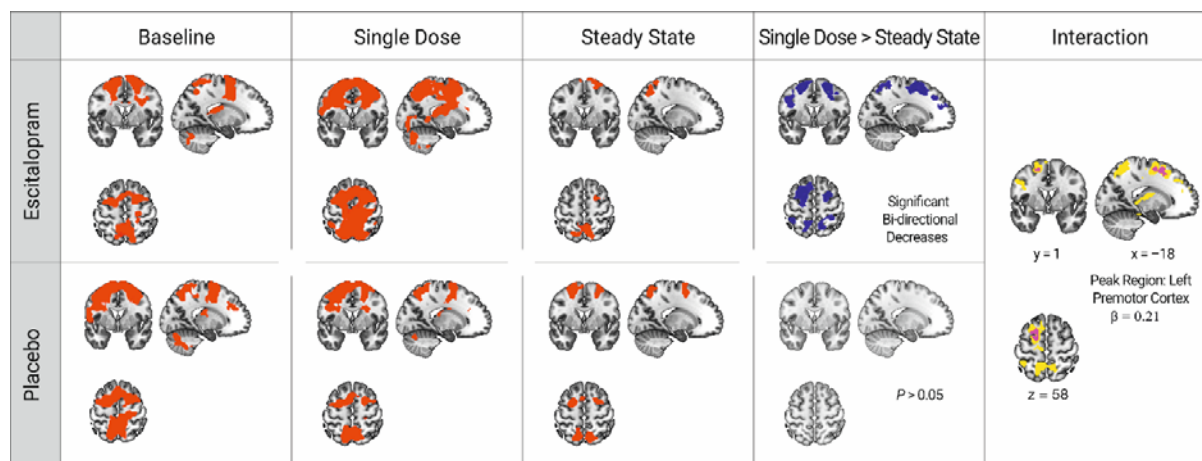

**Figure 3. Escitalopram-induced decreases in cortical motor responses during sequential motor learning:** Orthogonal brain slices showing group dependent changes in the learning contrast over time. Mean functional group response (red) of the escitalopram group (top) and placebo (bottom) at each baseline, single dose, and steady state measurements, as computed by a series of one-sample *t*-tests in SPM12. **Single Dose>Steady State:** Brain regions in the escitalopram group with significant decreases in the learning contrast (blue) between single dose and steady state (top row) show decreases in bilateral premotor and temporal-parietal regions (Table 3). Comparisons between single dose with steady state in the placebo group do not yield any significant changes across time (bottom). **Interaction:** Comparisons of groups over time reveal decreases in the learning contrast signal in the left premotor cortex of the escitalopram group that are not observed in placebo (violet). Consideration of behavioral performance as a variable of interest shows brain regions where changes in the learning contrast positively correlate with improvement in motor performance, also with a peak in the left premotor cortex (overlaid in yellow). All results are shown for sequence-specific learning with  $p < 0.05$  family-wise error (FWE) correction at a cluster forming threshold of  $p < 0.001$ . All orthogonal planes presented are the same.  $\beta$  = beta value at global maximum coordinate.

## Running Head: fMRI assessment of motor learning and escitalopram

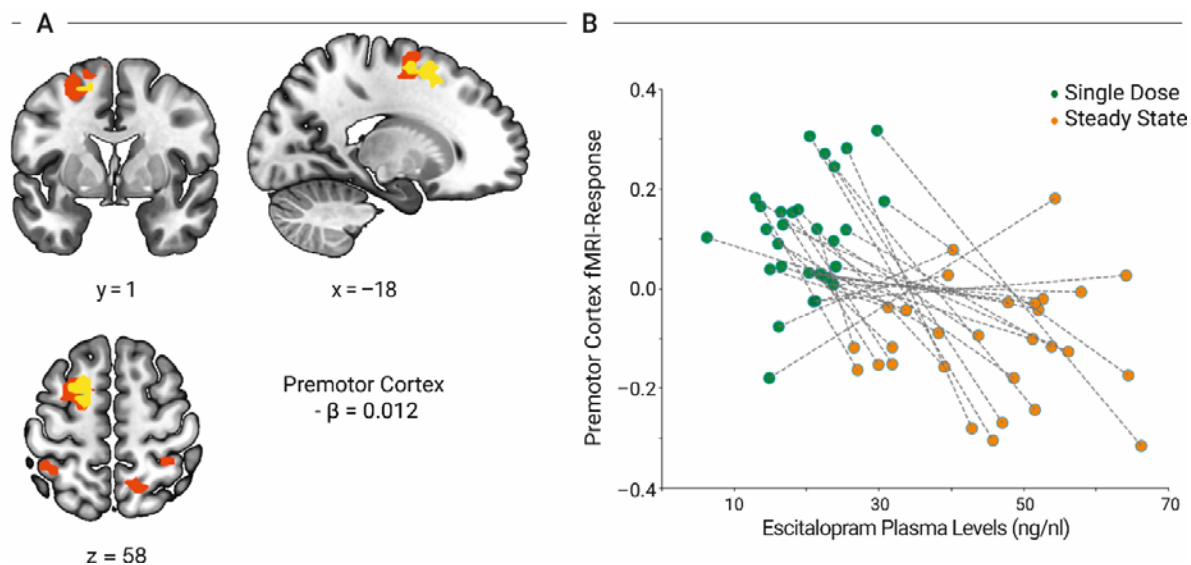

**Figure 4: Correlations between escitalopram plasma levels and cortical premotor response during sequence-specific learning from single dose to steady state:** (A) Escitalopram plasma concentrations negatively correlate with changes in the learning contrast in bilateral cortical motor regions, including the premotor cortex (premotor cortex from significant  $2 \times 2$  interaction overlaid in yellow), with a peak in the left supramarginal gyrus. (B) Betas containing parameter estimates for error from the left premotor cortex plotted against escitalopram plasma levels at single dose and steady state, respectively. Results refer to the sequence-specific learning contrast and are shown with  $p < 0.05$  family-wise error (FWE) correction at a cluster forming threshold of  $p < 0.001$ . Escit. = escitalopram, ng/ml = nanograms/milliliters.  $\beta$  = beta value at premotor MNI coordinates.

## Running Head: fMRI assessment of motor learning and escitalopram

### Tables:

**Table 1. Demographic overview:** Group demographic overview and mean single dose and steady state escitalopram plasma concentrations. Group values refer to mean $\pm$ standard deviation. Demographic values rounded to the nearest whole number. Escit. = escitalopram, ASEC = antidepressant side effect checklist-score, kg/m<sup>2</sup> = kilogram force per square meter, u/l = units per liter, ng/ml = nanograms/milliliters.

|                             | Escitalopram (n=31) | Placebo (n=33) | <i>t</i> -value | <i>p</i> -value |
|-----------------------------|---------------------|----------------|-----------------|-----------------|
| Age (years)                 | 24 $\pm$ 3          | 23 $\pm$ 4     | -0.3            | 0.74            |
| BMI (kg/m <sup>2</sup> )    | 22 $\pm$ 2          | 21 $\pm$ 2     | -1.3            | 0.19            |
| Lutropin (u/l)              | 2 $\pm$ 2           | 1 $\pm$ 2      | -1.2            | 0.20            |
| Follitropin (u/l)           | 3 $\pm$ 3           | 2 $\pm$ 3      | -1.3            | 0.19            |
| ASEC single dose            | 3 $\pm$ 3           | 1 $\pm$ 1      | 3.9             | $\leq$ 0.001    |
| ASEC steady state           | 1 $\pm$ 2           | 1 $\pm$ 1      | -0.7            | 0.48            |
| Escit. single dose (ng/ml)  | 20 $\pm$ 5          | -              | -               | -               |
| Escit. steady state (ng/ml) | 46 $\pm$ 11         | -              | -               | -               |

**Running Head:** fMRI assessment of motor learning and escitalopram

**Table 2. Comparisons of nested linear mixed effects models and post-hoc testing for sequence-specific lag scores:** Model comparisons for computing the omnibus tests for *group* and *time* as well as their interaction effect for both outcome measures.  $\chi^2$  and respective *p*-values were computed from LRT between nested models with results of independent samples *t*-tests and corresponding Bayes Factors on mean single dose, steady state, and absolute rate of improvement scores (deltas).  $BF_{01}$  = Bayes Factor indicating the likelihood of the alternative hypothesis compared to the null hypothesis.  $M \pm SD$  = means  $\pm$  standard deviation, LRT = likelihood ratio test, df = degrees of freedom,  $\chi^2$  = Chi-square. \*Significant improvement in model fit.

| Mixed Effects Modelling | Fixed Effects           | Random effects     | LRT                  |                 | Marginal $R^2$       |
|-------------------------|-------------------------|--------------------|----------------------|-----------------|----------------------|
|                         |                         |                    | $\chi^2$ (df)        | <i>p</i> -value |                      |
| Intercept               | -                       | Subject            | -                    | -               | 0                    |
| Time                    | time                    | Subject            | 3301.3 (24)          | $\leq 0.001^*$  | 0.2917               |
| Group                   | group+time              | Subject            | 0.0181 (1)           | 0.8931          | 0.2918               |
| Interaction             | group*time              | Subject            | 25.722 (24)          | 0.3674          | 0.2934               |
| Post-hoc Testing        | Escitalopram $M \pm SD$ | Placebo $M \pm SD$ | <i>t</i> -value (df) | <i>p</i> -value | Cohen's d/ $BF_{01}$ |
| Single dose             | 99.8 $\pm$ 57.9         | 95.1 $\pm$ 67.8    | -0.3 (62)            | 0.76            | -0.07/0.26           |
| Steady state            | 58.1 $\pm$ 36.1         | 63.8 $\pm$ 44.1    | 0.56 (62)            | 0.57            | 0.14/0.29            |
| Delta scores            | -107.1 $\pm$ 56.6       | -96.7 $\pm$ 59.2   | 0.71 (62)            | 0.47            | 0.18/0.31            |

**Running Head:** fMRI assessment of motor learning and escitalopram

**Table 3. Escitalopram-induced motor network changes in the learning contrast during sequence motor learning:** Results of a paired comparison of single dose and steady state within the escitalopram group and subsequent interaction comparisons with placebo. All results obtained with a 2x2 flexible factorial design. T=t-values, Z=z-values, MNI(x,y,z)=MNI peak coordinates, Escit. = escitalopram group.

| Brain Region                     | <i>p</i> (FWE-corr) | Cluster Extent | T    | Z    | MNI (x,y,z)  |
|----------------------------------|---------------------|----------------|------|------|--------------|
| <i>Escit. Paired</i>             |                     |                |      |      |              |
| Left Premotor Cortex             | <0.001              | 913            | 6.33 | 5.50 | -18, 11, 59  |
|                                  |                     |                | 6.25 | 5.44 | -21, 11, 50  |
|                                  |                     |                | 6.17 | 5.39 | -27, 8, 59   |
| Right Premotor Cortex            | <0.001              | 233            | 6.15 | 5.38 | 30, -4, 41   |
|                                  |                     |                | 5.10 | 4.62 | 24, -4, 65   |
|                                  |                     |                | 4.28 | 3.97 | 30, 2, 62    |
| Left Superior Parietal Lobule    | <0.001              | 260            | 5.82 | 5.14 | -39, -46, 53 |
|                                  |                     |                | 5.33 | 4.79 | -33, -43, 32 |
|                                  |                     |                | 5.13 | 4.64 | -36, -46, 41 |
| Left Middle Temporal Gyrus       | 0.025               | 97             | 4.97 | 4.52 | -48, -58, -4 |
|                                  |                     |                | 3.33 | 3.17 | -39, -67, 8  |
| Left Superior Frontal Gyrus      | <0.001              | 295            | 4.87 | 4.44 | -18, 35, 38  |
|                                  |                     |                | 4.53 | 4.17 | -18, 44, 20  |
|                                  |                     |                | 4.31 | 4.00 | -15, 56, 26  |
| Right Superior Parietal Lobule   | <0.001              | 257            | 4.74 | 4.34 | 12, -61, 62  |
|                                  |                     |                | 4.23 | 3.93 | 18, -61, 50  |
|                                  |                     |                | 4.06 | 3.79 | 33, -40, 59  |
| Left Postcentral Gyrus           | <0.001              | 215            | 4.70 | 4.30 | -9, -46, 74  |
|                                  |                     |                | 4.67 | 4.28 | -12, 52, 65  |
|                                  |                     |                | 3.63 | 3.44 | -15, -70, 50 |
| Right Middle Temporal Gyrus      | 0.002               | 172            | 4.67 | 4.29 | 42, -58, 11  |
|                                  |                     |                | 3.77 | 3.55 | 33, -58, 23  |
|                                  |                     |                | 3.68 | 3.47 | 27, -76, 11  |
| <i>Interaction</i>               |                     |                |      |      |              |
| Left Premotor Cortex             | 0.044               | 82             | 4.36 | 4.04 | -21, 11, 50  |
|                                  |                     |                | 4.17 | 3.88 | -15, 8, 59   |
|                                  |                     |                | 4.10 | 3.82 | -18, -4, 59  |
| <i>Interaction (Sensitivity)</i> |                     |                |      |      |              |
| Left Premotor Cortex             | 0.017               | 111            | 4.68 | 4.29 | -21, 11, 50  |
|                                  |                     |                | 4.26 | 3.95 | -15, 8, 59   |
|                                  |                     |                | 4.07 | 3.80 | -27, 5, 56   |
